# Supplementary material for: Plasma Concentration of Tumor Necrosis Factor-Stimulated Gene-6 as a Novel Diagnostic and 3-Month Prognostic Indicator in Non-Cardioembolic Acute Ischemic Stroke
Source: PubMed Central journal article supplement (PMC8868935; doi:10.3389/fimmu.2022.713379), 2022-02-10
Supplement: Image_1.pdf [file Image_1.pdf]

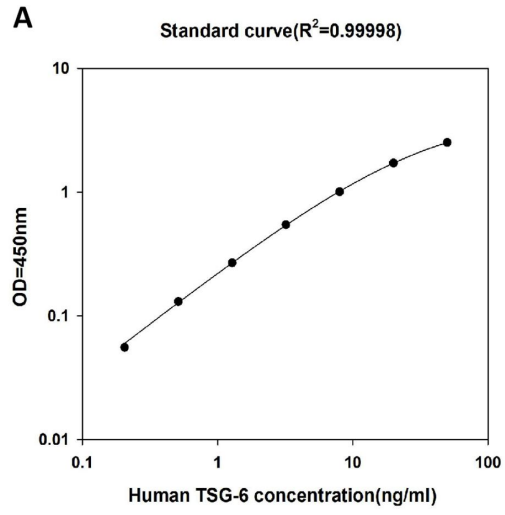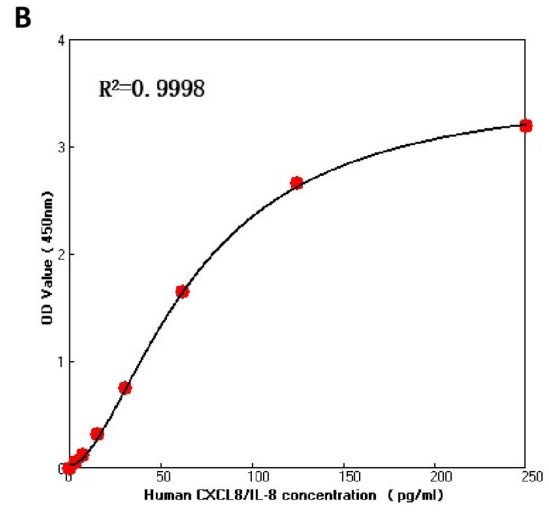

**Supplementary Figure 1 | Standard curve. (A) TSG-6 (B) Interleukin-8.**
